# Supplementary material for: In situ fabrication of a NiO nanoparticles/single-layered MXene nanosheet Schottky heterojunction toward sensing xylene and formaldehyde
Source: Royal Society of Chemistry journal article supplement (doi:10.1039/d3ta02002a), 2023-01-01
Supplement: d3ta02002a1.pdf [file d3ta02002a1.pdf]

## Supplementary information

### **In situ fabrication of NiO nanoparticles / single-layered MXene nanosheet Schottky heterojunction toward sensing xylene and formaldehyde**

Xueying Song,<sup>a</sup> Kuikun Gu,<sup>a</sup> Qinwei Zhang,<sup>a</sup> Linhu Jin<sup>a</sup>, Chunfeng He\* and Mingzhe Zhang\*<sup>a</sup>

<sup>a</sup> *State Key Laboratory of Superhard Materials, college of physics, Jilin University, Changchun 130012, People's Republic of China. Email address: [zhangmz@jlu.edu.cn](mailto:zhangmz@jlu.edu.cn), [hecf@jlu.edu.cn](mailto:hecf@jlu.edu.cn)*

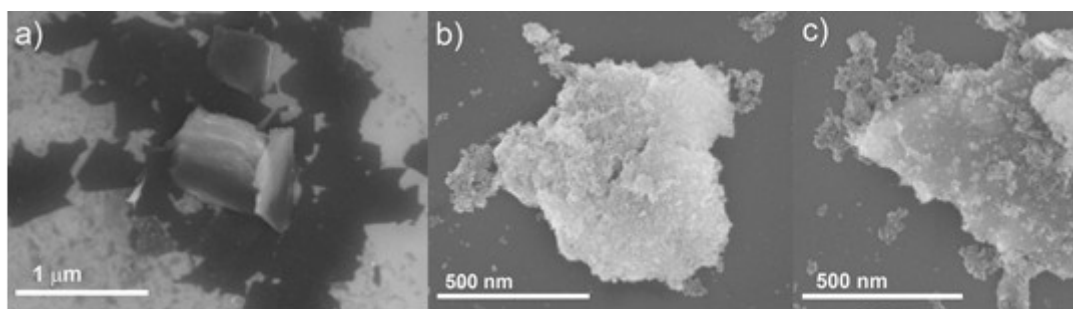

**Fig. S1** SEM image of (a) single layered MXene (b) NiO and (c) NiO-MXene.

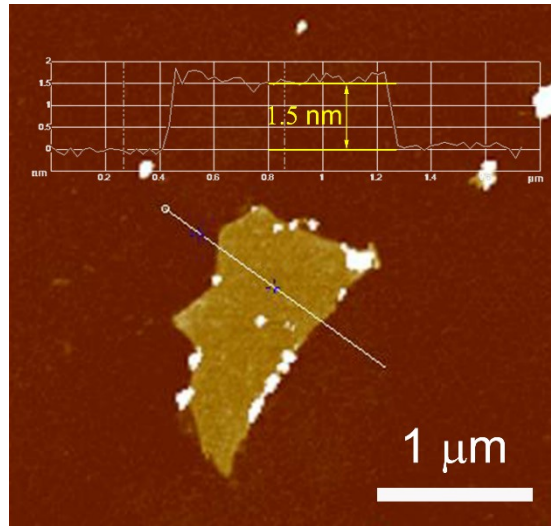

**Fig. S2** AFM of single-layer  $\text{Ti}_3\text{C}_2\text{T}_x$  MXene

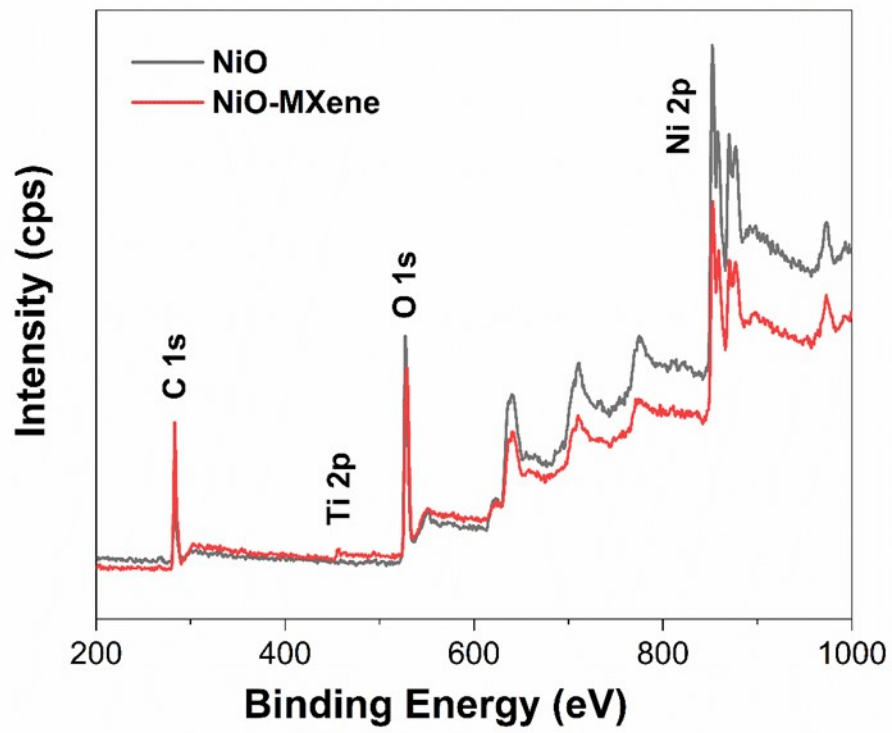

**Fig. S3** Wide XPS spectrum of pure NiO and NiO-Ti<sub>3</sub>C<sub>2</sub>T<sub>x</sub> MXene composites.

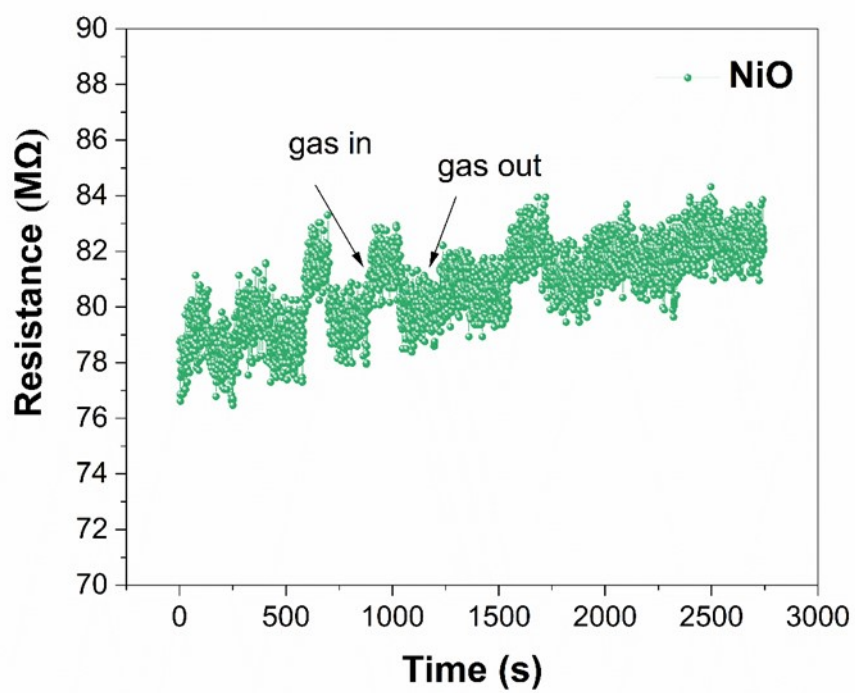

**Fig. S4** The response of pure NiO based sensor to 500 ppm xylene at room temperature.

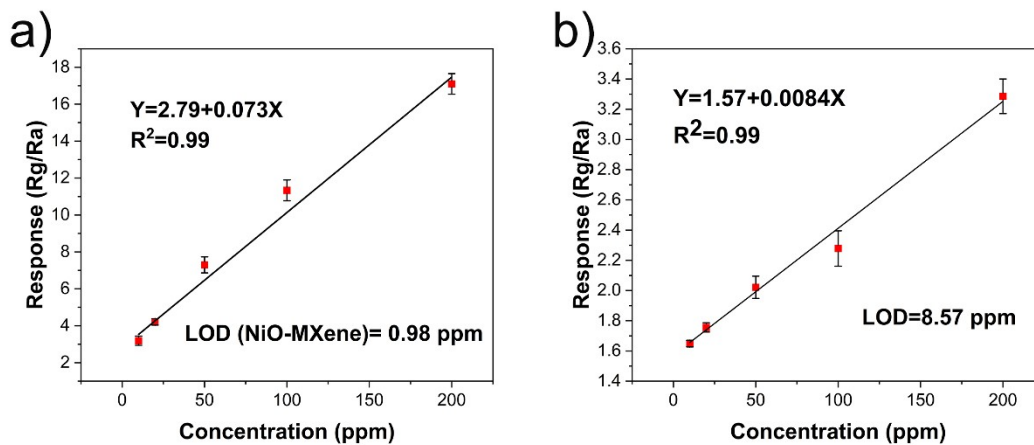

Fig. S5 (a) The linear fitting of response curve of NiO-MXene based sensors. (b) The linear fitting of response curve of NiO-MXene based sensors.

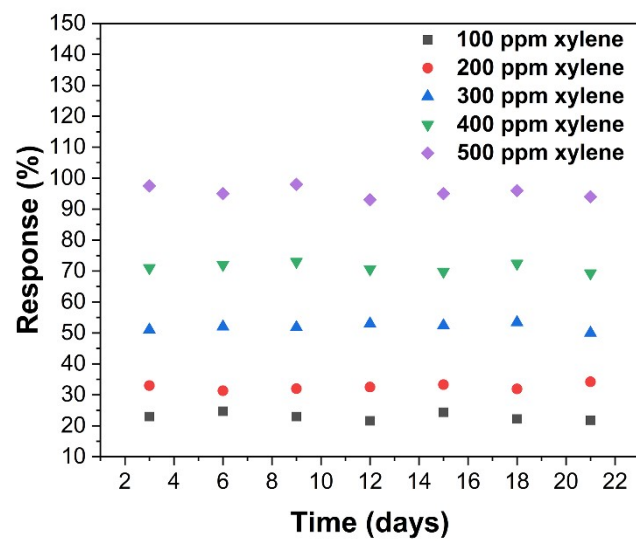

**Fig. S6** The long-term stability of NiO-MXene based sensor at room temperature to a variety of xylene concentrations

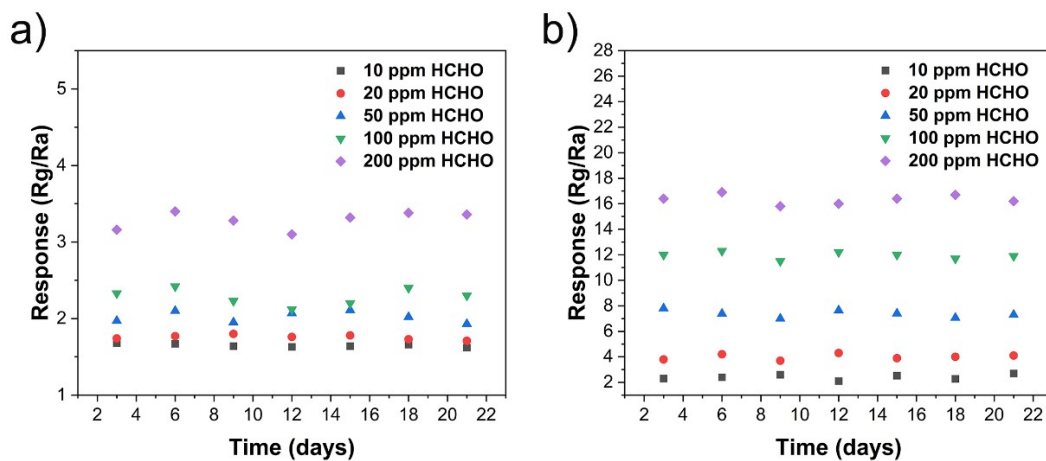

**Fig. S7** (a) The long-term stability of pure NiO based sensor at 170°C to a variety of formaldehyde concentrations;(b) The long-term stability of NiO-MXene based sensor at 170°C to a variety of formaldehyde concentrations.



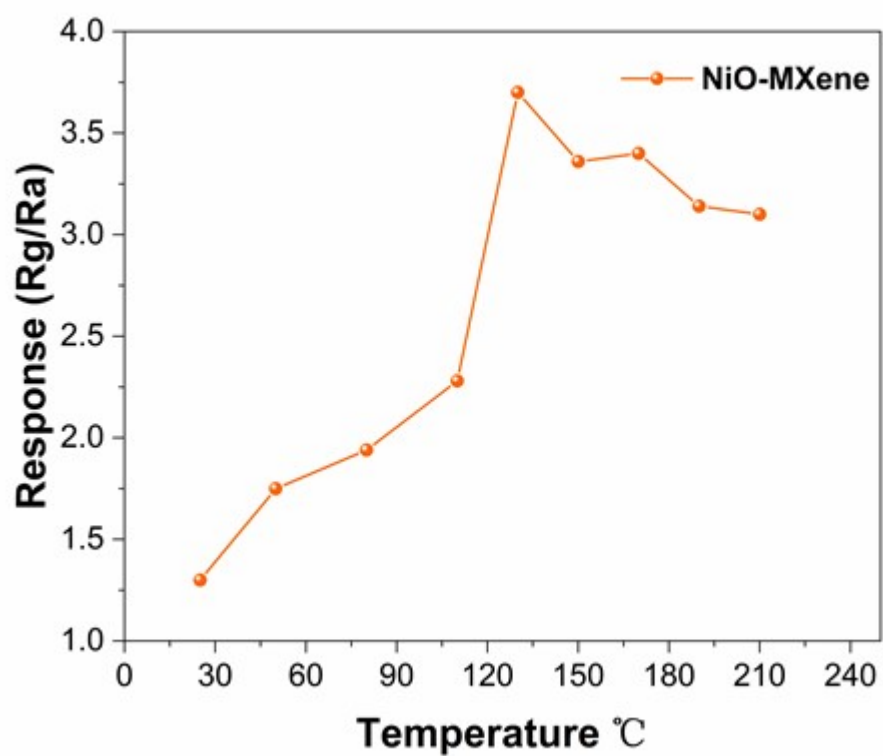

**Fig. S8** The response values of NiO-MXene based sensors to 100 ppm xylene at different operating temperature

**Table S1** Comparison of xylene sensing performance to different gas sensors.

| sample                               | test gas | Temperature | concn<br>(ppm) | response<br>(%) | Response/<br>recovery | ref          |
|--------------------------------------|----------|-------------|----------------|-----------------|-----------------------|--------------|
| NiO/NiCr <sub>2</sub> O <sub>4</sub> | xylene   | 225 °C      | 100            | 66.2 b          | 1217s<br>/591s        | [51]         |
| Sn-doped NiO                         | xylene   | 225°C       | 100            | 20.2b           | 298s/223s             | [54]         |
| W-doped NiO                          | xylene   | 375°C       | 200            | 8.62 b          | 178s/152s             | [53]         |
| Au-loaded<br>MoO <sub>3</sub>        | xylene   | 250°C       | 5              | 2.5b            | 118s/289s             | [52]         |
| Cr-doped NiO                         | xylene   | 325°C       | 50             | 88 b            | 144s/50s              | [20]         |
| NiO/MXene                            | xylene   | 25°C        | 500            | 92a             | 185s/190s             | this<br>work |

**Table S2** Comparison of formaldehyde sensing performance to different gas sensors.

| sample                         | test gas | Temperature | concn<br>(ppm) | response<br>(%) | Response/<br>recovery | ref          |
|--------------------------------|----------|-------------|----------------|-----------------|-----------------------|--------------|
| ZnO-TiO <sub>2</sub>           | HCHO     | 25°C        | 20             | 88.9 a          | 30s/445s              | [55]         |
| In <sub>2</sub> O <sub>3</sub> | HCHO     | 420°C       | 100            | 1.7 b           | 48s/58s               | [56]         |
| NiO coral like<br>structures   | HCHO     | 300°C       | 190            | 292 a           | 24s/42s               | [57]         |
| Sn-NiO                         | HCHO     | 230°C       | 100            | 16.3b           | 107s/10s              | [58]         |
| Pt-loaded<br>NiO               | HCHO     | 200°C       | 1000           | 8.4b            | 102s/70s              | [59]         |
| NiO/MXene                      | HCHO     | 170°C       | 100            | 11.4 b          | 53s/21s               | this<br>work |

$$\mathbf{a\ S = (R_g - R_a) / R_a * 100\%}$$

$$\mathbf{b\ S = (R_g / R_a)}$$

The Schottky barrier values can be obtained according to the formula of the 2 D thermal electron emission theory, i. e., the relation between current and voltage. The height of the Schottky barrier measured by thermal activation is actually a combination of the I-U method and the activation energy method. The quality factor n, the effective Richard constant  $A_{2D}^*$ , and the Schottky barrier height  $\Phi_B$  can be determined. If the Schottky barrier is formed on a high-mobility semiconductor, the electron through the Schottky barrier is mainly generated by the hot electron emission effect. The energy level distribution of the thermal electrons satisfies the Fermi-Dirac distribution, so the current I of the barrier and the applied voltage satisfy the following relationship:

$$I = I_0 \exp\left[\frac{q(U - IR)}{nkT} - 1\right] \dots\dots\dots(1)$$

$$I_0 = AA_{2D}^* T^2 e^{-q\Phi_B/kT} \dots\dots\dots(2)$$

Where A is the contact area of the metal-semiconductor node,  $A_{2D}^*$  is the Richard constant, q is the amount of electron charge,  $\Phi_B$  is the Schottky barrier height value, k is the Boltzmann constant, n is the quality factor, and U is the voltage. When  $q(U - IR) \geq 3 kT$ , there is an approximation:

$$I = I_0 e^{q(U - IR)/nkT} \dots\dots\dots(3)$$

Regardless of n, R with temperature,  $n \approx 1$ , there is an approximation:

$$I = I_0 e^{qU/kT} = AA_{2D}^* e^{q(U - \Phi_B)/kT} \dots\dots\dots(4)$$

It can be sorted out:

$$\ln\left(\frac{I}{T^2}\right) = \ln AA_{2D}^* - \frac{q(\Phi_B - U)}{1000k} * \frac{1000}{T} \dots\dots\dots(5)$$

Measure the current at different temperatures and make the  $\ln\left(\frac{I}{T^2}\right) - \frac{1000}{T}$  line, and the Schottky barrier height can be determined from the intercept and slope.

|       |        |        |         |         |         |
|-------|--------|--------|---------|---------|---------|
| U(V)  | 0.16   | 0.16   | 0.16    | 0.16    | 0.16    |
| I(μA) | 294.14 | 921.48 | 2355.69 | 5189.97 | 7006.79 |
| T(K)  | 374.15 | 384.15 | 404.15  | 424.15  | 444.15  |

To obtain the corresponding relationship curve based on the above data:

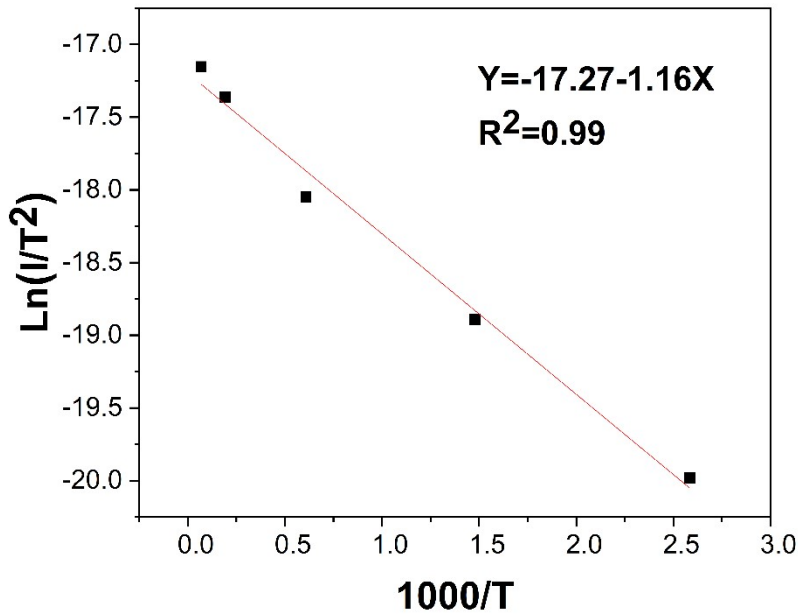

We can see from the figure that  $Y = -17.27 - 1.16X$ , where  $-\frac{q(\Phi_B - U)}{1000k} = -1.16$  and can obtain  $\Phi_B = 0.26V$ .

## References

- 20 C. Feng, X. Kou, X. Liao, Y. Sun and G. Lu, *Rsc Adv.*, 2017, 7 (65), 41105-41110.
- 51 H. Y. Gao, J. Guo, Y. W. Li, C. L. Xie, X. Li, L. Liu, Y. Chen, P. Sun, F. M. Liu, X. Yan, F. M. Liu, G. Y. Lu, *Sens. Actuators B Chem.*, 2019, 284, 305-315.
- 52 L. L. Sui, X. F. Zhang, X. L. Cheng, P. Wang, Y. M. Xu, S. Gao, H. Zhao and L. H. Huo, *ACS Appl. Mater. Interfaces.*, 2017, 9 (2), 1661-1670.
- 53 C. H. Feng, C. Wang, H. Zhang, X. Li, C. Wang, P. F. Cheng, J. Ma, P. Sun, Y. Gao, H. Zhang, Y. F. Sun, J. Zheng and G. Y. Lu, *Sens. Actuators B Chem.*, 2015, 221, 1475-1482.
- 54 H. Y. Gao, D. D. Wei, P. F. Lin, C. Liu, P. Sun, K. Shimano, N. Yamazoe and G. Y. Lu, *Sens. Actuators B Chem.*, 2017, 253, 1152-1162.
- 55 J. B. Park, J. H. Lee, M. S. Choi and J. S. Huh, *Chemosensors*, 2023, 11 (2).
- 56 W. Yang, P. Wan, X. D. Zhou, J. M. Hu, Y. F. Guan and L. Feng, *Sens. Actuators B Chem.*, 2014, 201, 228-233.
- 57 S. Dey, S. Santra, S. Sen, D. Burman, S. K. Ray and P. K. Guha, *IEEE Sens. J.*, 2018, 18 (14), 5656-5661.
- 58 L. Xu, M. Y. Ge, F. Zhang, H. J. Huang, Y. Sun and D. N. He, *J. Mater. Res.*, 2020, 35 (22), 3079-3090.
- 59 C. J. Dong, Q. Li, G. Chen, X. C. Xiao and Y. D. Wang, *Sens. Actuators B Chem.*, 2015, 220, 171-179.
